# Supplementary material
Source: Springer Nature journal article supplement (https://www.springermedizin.de/resource/supplementary/12875_2013_879_MOESM2_ESM.pdf/9435700)
Supplement: MOESM2 [file 9435700]

Recruitment of  
general practices

Randomisation PNs

**Control group**

**Intervention group**

SMS Training +  
booster sessions,  
financial support,  
registration system

Self-administered  
screening  
questionnaires  
DS\* and DFT\*\*

Self-administered  
screening  
questionnaires  
DS and DFT

If DFT>4 and DS>3  
Invitation to study

RESEARCHER-LED  
SCREENING

If DFT>4 and DS>3  
Invitation to study

Informed consent

Informed consent

Baseline  
measurement

Baseline  
measurement

Usual diabetes care

DIABETES  
CARE

Usual diabetes care  
+ SMS

**SMS:**  
Detection  
+ Treatment  
  
See figure 1

4-months  
follow-up

FOLLOW-UP

4-months  
follow-up

12-months  
follow-up

12-months  
follow-up
